# Supplementary material for: The role of stochastic thermal environments in modulating the thermal physiology of an intertidal limpet, Lottia digitalis
Source: Oxford University Press journal article supplement (doi:10.1242/jeb.159020), 2017-08-30
Supplement: jeb159020supp.pdf [file jeb159020supp.pdf]

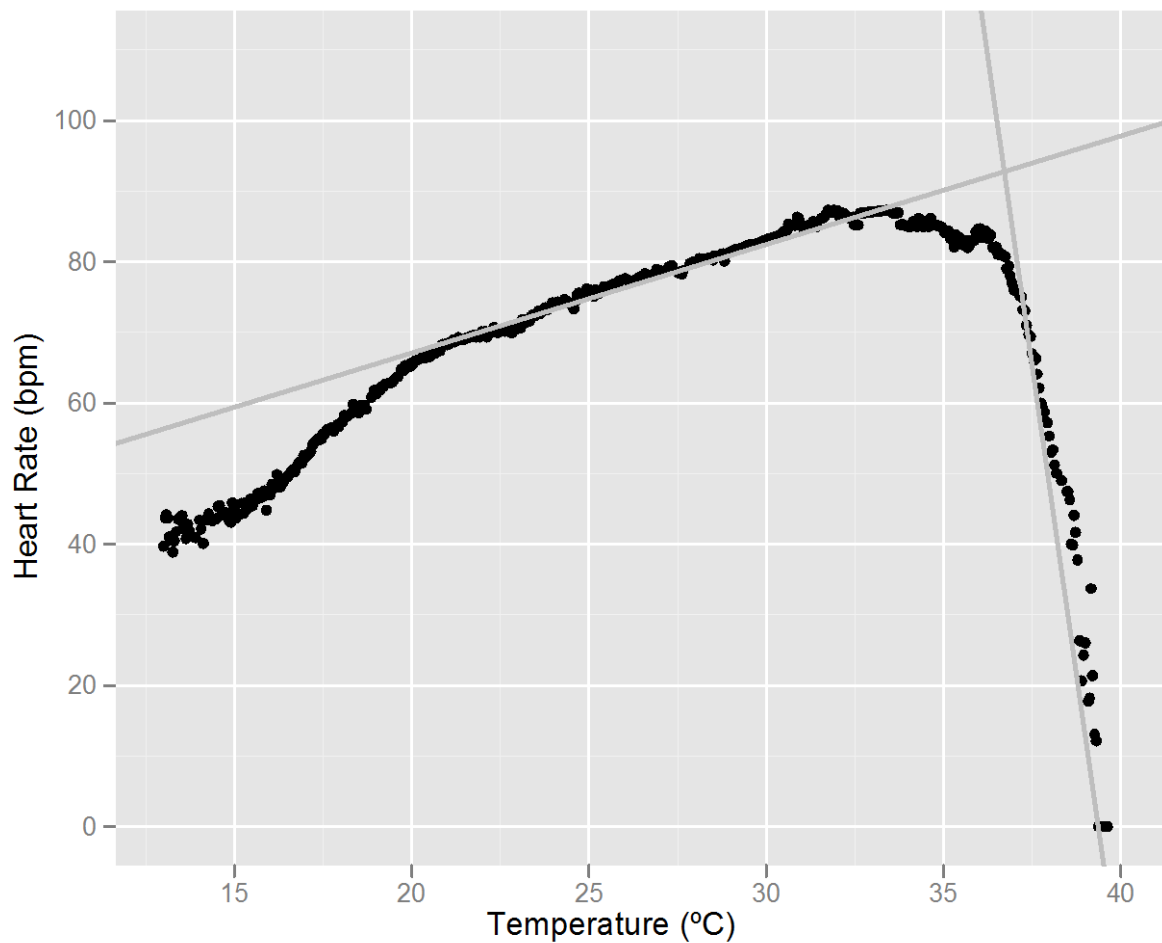

Figure S1. Final break point temperature (BPT) was measured as the highest temperature at which heart rate drastically decreased. To calculate final BPT, individual limpet heart rates (bpm) were plotted over temperature and best-fit regression lines were found for the ascending portion of heart rate and for the descending portion of the heart rate. The final BPT of each limpet was determined to be the intersection between the two best-fit regression lines.
